# Supplementary material for: Exploring the transcriptional cooperation between RUNX2 and its associated elncRNA RAIN
Source: Springer Nature journal article supplement (doi:10.1038/s41419-024-07058-x), 2024-09-14
Supplement: MOESM1 [file 41419_2024_7058_MOESM1_ESM-1.pdf]

# Supplementary FIGURE 1

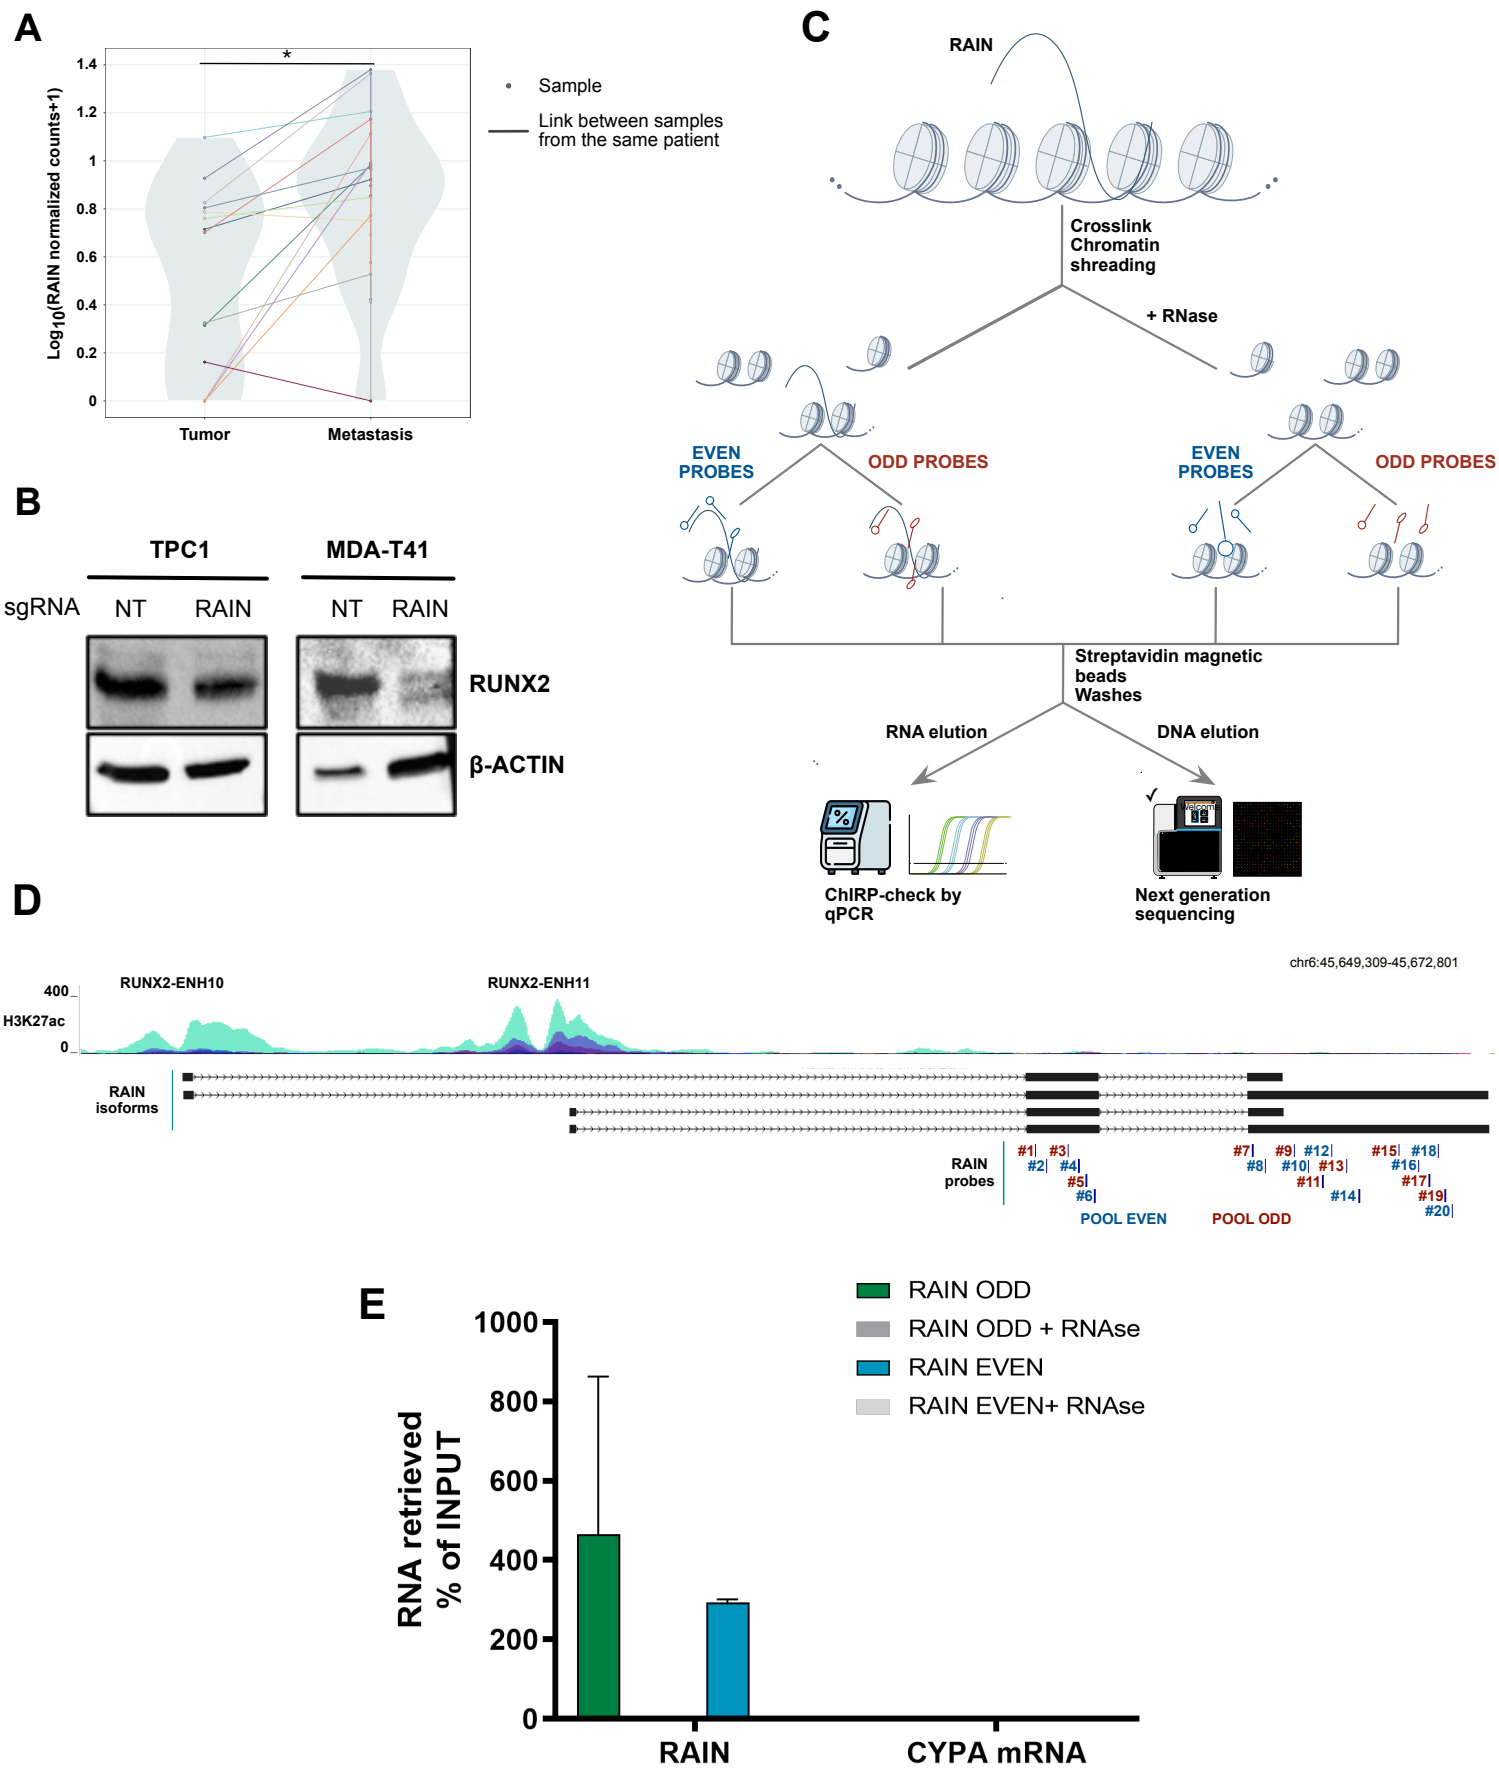

# Supplementary FIGURE 2

**A**

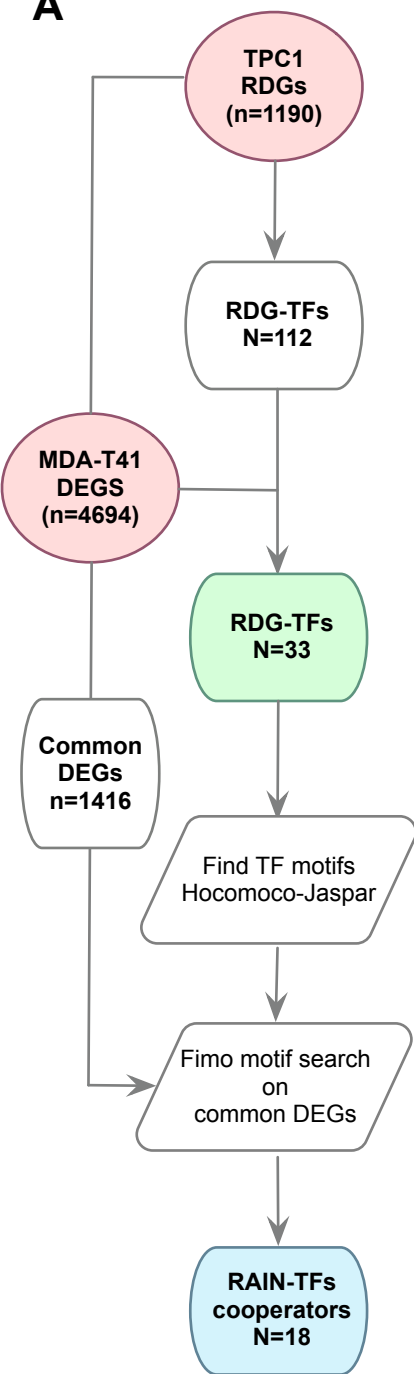

**B**

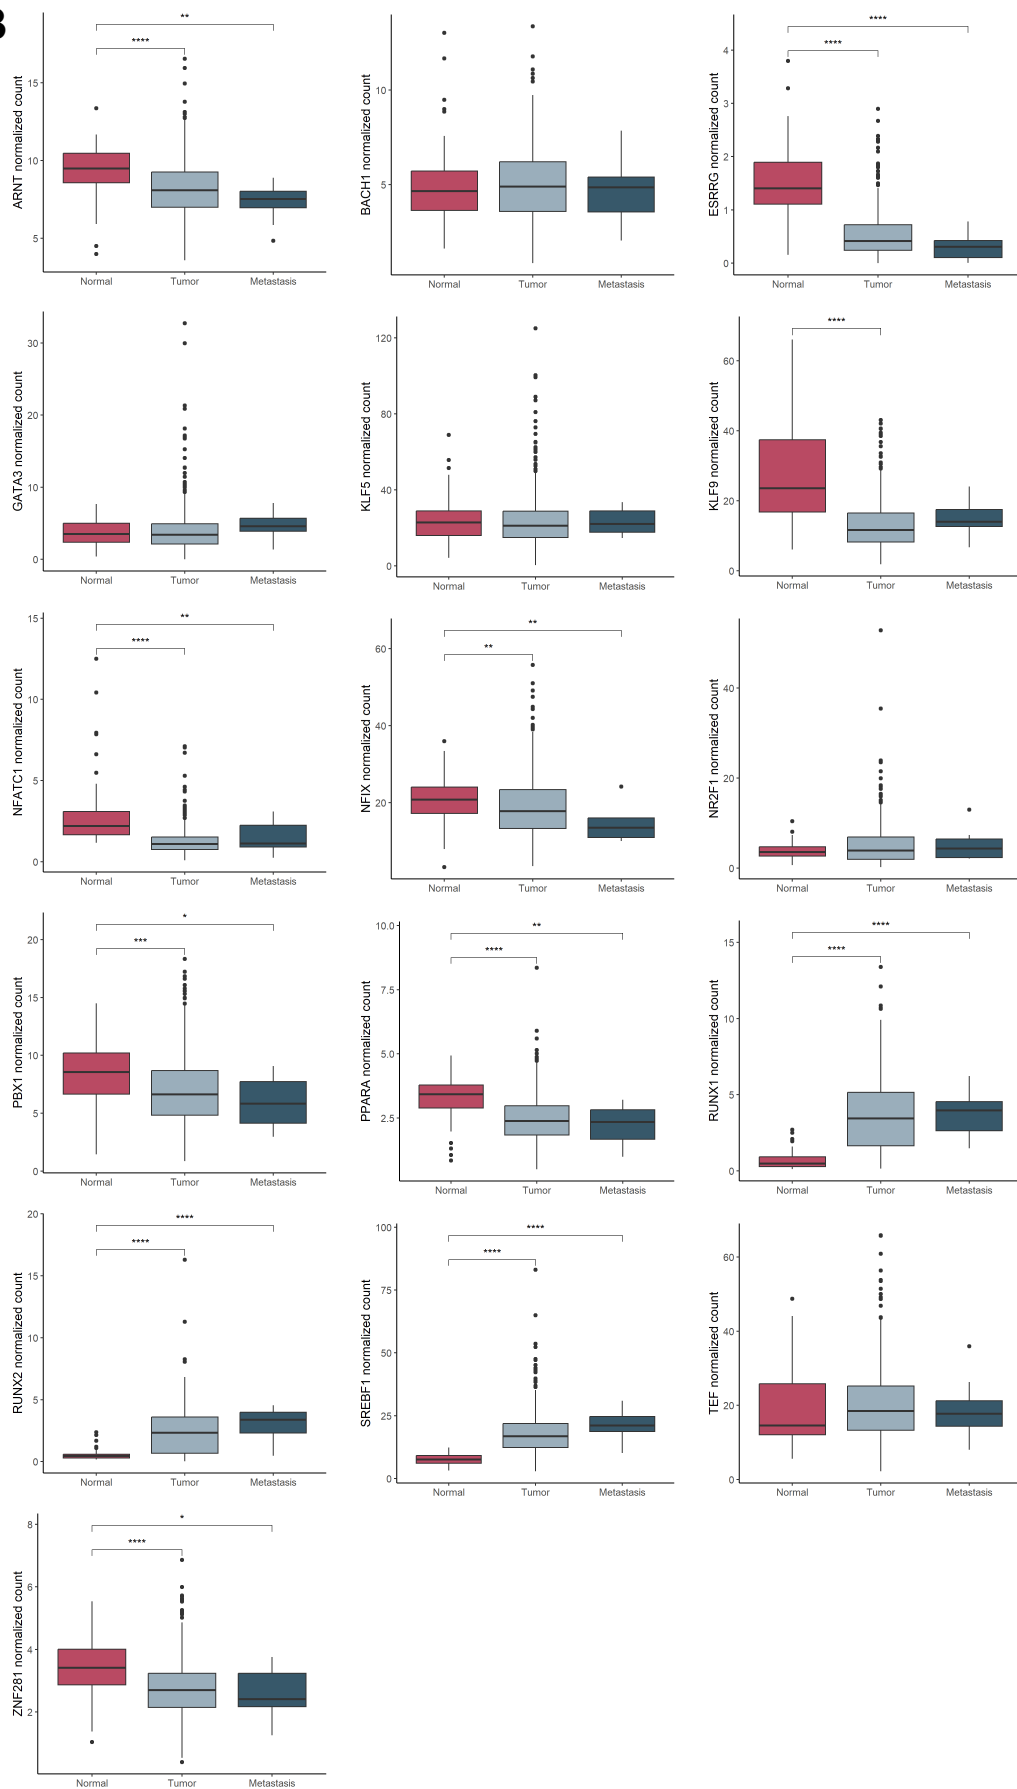

## Supplementary Figure Legends

**Supplementary Figure S1 A.** Violin plot showing RAIN expression in matched primary tumors, and metastases from 14 patients included in the publicly available cohort. Colored dots represent the samples. Colored lines link samples from the same patients. \*p-value<0.05 **B.** Western Blot showing RUNX2 protein level in RAIN KD (RAINsgRNA) and control (NTsgRNA) cells. **C.** Schematic overview of the ChIRP-seq approach. **D.** Screenshot of RAIN locus from Genome Browser. Track represents H3K27ac signal at RAIN promoters in different cell lines, genomic regions of RUNX2 ENH10 and ENH11 are highlighted on top of H3K27ac track. All RAIN isoforms and genomic mapping of ChIRP probes are shown. **E.** Control of ChIRP experiment in qRT-PCR. CYPA mRNA was used as negative control.

**Supplementary Figure S2 A.** Schematic workflow of FIMO analysis. **B.** Boxplots showing the expression levels of 16 out of 18 RAIN-TFs putative cooperators in THCA-TCGA dataset. Gene expression was evaluated by comparing Normal tissue with Primary Tumor and Metastatic lesions. \*p-value<0.05; \*\* p-value<0.01, \*\*\*p-value<0.001; \*\*\*\*p-value<0.0001.

**Supplementary Table 1** CRISPRi sgRNA sequences

| Name      | Target         | Sequence             |
|-----------|----------------|----------------------|
| RAINsgRNA | RAIN gene body | GCAATACTCCCTCCTGCCAT |
| NTsgRNA   | -              | CTGAAAAAGGAAGGAGTTGA |

**Supplementary Table 2** List of qPCR primers

| Target                             | Forward primer           | Reverse primer        |
|------------------------------------|--------------------------|-----------------------|
| <i>Primers for gene expression</i> |                          |                       |
| RUNX2                              | GCTCTTCTTACTGAGAGTGGAAGG | GTGCCTAGGCGCATTTC     |
| RAIN                               | CTCAAAGCAAGTCGCCAAAG     | CCTGTGATCTGCCCTTTAGC  |
| ACTB                               | ACCTTCTACAATGAGCTGCG     | CCTGGATAGCAACGTACATGG |
| CYP4                               | GACCCAACACAAATGGTTCC     | TTTCACTTTGCCAAACACCA  |
| <i>Primers for ChIP</i>            |                          |                       |
| RUNX1-P1                           | CTGTGGGTTGGTGATGCTC      | AGCCTGGCAGTGTGAGAAGT  |
| RUNX1-P2                           | GGCTGGTCCTCTGGTTTGT      | TGGCTGCCTTCCGAAGAGT   |
| RUNX2-P2                           | ACCATGGTGGAGATCATCG      | GGCAGGGTCTTGTTGCAG    |
| TGFB2 prom                         | TAGACATGCCGCCCTTCTTC     | TGCTGCGGTTTTGAGAGCTC  |
| TGFA prom                          | GACCATTTTACGGGCGGGC      | CCCTGCCTAGTCTGCGTCTT  |
| TGFA ENH                           | CCTGTGGCATTGAGGGTG       | TGAATCCCTGTCTGGCCACT  |
| SPARC ENH                          | CACTGAACGGCTCGCTTCC      | GGCGGAGATGATTTACACCA  |
| CXXC5 prom                         | TACCCAAGCCTCCCTAAGCC     | GCCGTCCCAGACCCTAAAAC  |
| GLI3 intron                        | GCAGGGCTTTGAAAACGCAC     | TAGTAACCCAGCTTTGCGGT  |
| FLNB intron                        | CCCCACATACTCCAACAAGCA    | CTTGGGTATGCAGTGACGCT  |
| EGR3 prom                          | GGTCGAGGATGTGCGGTTTT     | GGGATTTCAGTGCACGTGTT  |
| TGFB1 prom                         | TGTTGTACAGGGCGAGCAC      | CAGATCCTGTCCAAGCTGCG  |
| CDH6 prom                          | GGCTCCGTTGGCTATGCATA     | GGGCTCTCTCTGATTGGC    |
| RUNX2 UP                           | TCTCAAGGTGCCTGTCTGC      | TGAAGTTTGGCCTCTGGTCT  |

**Supplementary Table 3** List of RAIN probes used for ChIRP

| <b>Name</b>        | <b>Sequence</b>       | <b>Pool</b> |
|--------------------|-----------------------|-------------|
| RAIN ChIRP_probe1  | ACCTGGGGAAAAGGCCTGAG  | ODD         |
| RAIN ChIRP_probe2  | AGAGATGGTCGAAGGGCAAC  | EVEN        |
| RAIN ChIRP_probe3  | CCATTAGTTGGCATCCGAAA  | ODD         |
| RAIN ChIRP_probe4  | GTCTGTTTCACGCTGAAACG  | EVEN        |
| RAIN ChIRP_probe5  | TTTTTCTGCTAGACGCTCAA  | ODD         |
| RAIN ChIRP_probe6  | CTTTGGCGACTTGCTTTGAG  | EVEN        |
| RAIN ChIRP_probe7  | TTTAGTTGATGCCGGTTTTG  | ODD         |
| RAIN ChIRP_probe8  | TAAGCTACCTAGATGGGTTC  | EVEN        |
| RAIN ChIRP_probe9  | AAGCCATAACAGCCCTAAAG  | ODD         |
| RAIN ChIRP_probe10 | TACACCATGTGAGTGACCAT  | EVEN        |
| RAIN ChIRP_probe11 | AATCACACCGATTCTGGTTT  | ODD         |
| RAIN ChIRP_probe12 | GTTGTGACAGTGCTATTGAC  | EVEN        |
| RAIN ChIRP_probe13 | CTTTGACCCACAGTACTACT  | ODD         |
| RAIN ChIRP_probe14 | CATAGACTGAGAGCCAAGGG  | EVEN        |
| RAIN ChIRP_probe15 | TTGGTAAAGGAAGACGGCCA  | ODD         |
| RAIN ChIRP_probe16 | TGCTACCAAGAGGAAGTCTA  | EVEN        |
| RAIN ChIRP_probe17 | TTGGTAAGGTTCCCTTGTTTT | ODD         |
| RAIN ChIRP_probe18 | AGAGCCATCACGTTGGACAG  | EVEN        |
| RAIN ChIRP_probe19 | GACGAGAGAGGAGGGTGATA  | ODD         |
| RAIN ChIRP_probe20 | CTTGGACCTTGGGATACTAA  | EVEN        |

**Supplementary Table 4** Clinical features of PTC patients selected for Nanostring analysis

| Metastatic Samples (DM) |     |     |    |    |        | Control Samples (CTRL) |     |     |    |    |        |
|-------------------------|-----|-----|----|----|--------|------------------------|-----|-----|----|----|--------|
| Sample                  | Age | Sex | pN | pT | pSTAGE | Sample                 | Age | Sex | pN | pT | pSTAGE |
| DM33                    | 51  | F   | 1a | 3  | 3      | NO09                   | 66  | F   | 0  | 1b | 1      |
| DM30                    | 47  | M   | 1b | 3  | 4c     | NO13                   | 51  | F   | 0  | 3  | 3      |
| DM55                    | 82  | F   | 1B | 2  | 2      | NO19                   | 68  | F   | 0  | 2  | 2      |
| DM01                    | 90  | M   | 1b | 4a | 4a     | NO26                   | 22  | M   | 0  | 1b | 1      |
| DM56                    | -   | M   | -  | -  | -      | NO33                   | 67  | F   | 0  | 2  | 2      |
| DM51                    | 53  | M   | 1B | 3  | 4a     | NO41                   | 57  | F   | 0  | 2  | 2      |
| DM34                    | 47  | M   | 0  | 3  | 3      | NO43                   | 64  | F   | 0  | 2  | 2      |
| DM45                    | 19  | F   | 1b | 3  | 2      | NO44                   | 59  | F   | 0  | 1b | 1      |
| DM43                    | 22  | F   | 1a | 4a | 2      | NO47                   | 47  | F   | 0  | 1b | 1      |
| DM06                    | 73  | M   | 1b | 3  | 4a     | NO53                   | -   | M   | 0  | 2  | -      |
| DM28                    | 59  | F   | 1b | 4a | 4a     | NO54                   | -   | F   | 0  | 1b | -      |
| DM29                    | 58  | F   | 0  | 3  | 3      | NO57                   | -   | F   | 0  | 1b | -      |
| DM12                    | 71  | F   | 1a | 4a | 4a     | CT29                   | 30  | M   | 0  | 1B | -      |
| DM20                    | 63  | M   | 1b | 3  | 4c     | CT52                   | 22  | M   | 0  | 1A | -      |
| DM04                    | 80  | M   | 1b | 3  | 4a     | NO15                   | 57  | F   | 0  | 1b | 1      |
| DM48                    | 63  | F   | 1a | 4a | 4a     | NO20                   | 53  | F   | 0  | 1b | 1      |
| DM15                    | 68  | F   | 1b | 3  | 4a     | NO21                   | 63  | F   | 0  | 3  | 3      |
| NI74                    | 68  | M   | 1a | 3b | -      | NO29                   | 64  | F   | 0  | 3  | 3      |
| DM37                    | 34  | F   | 1a | 3  | 1      | NO32                   | 64  | F   | 0  | 1b | 1      |
| DM41                    | 28  | F   | 1b | 3  | 2      | NO35                   | 54  | F   | 0  | 1b | 1      |
| DM52                    | 58  | M   | 0  | 1b | 1      | NO36                   | 61  | F   | 0  | 1b | 1      |
| DM14                    | 68  | F   | 1a | 3  | 3      | NO46                   | 47  | F   | 0  | 1b | 1      |
| DM21                    | 63  | F   | 0  | 2  | 4a     | NO58                   | -   | F   | 0  | 1a | -      |
| DM07                    | 72  | F   | 1a | 3  | 4c     | NO74                   | -   | M   | 0  | 1n | -      |
