# Supplementary material for: Exploring the transcriptional cooperation between RUNX2 and its associated elncRNA RAIN
Source: Springer Nature journal article supplement (doi:10.1038/s41419-024-07058-x), 2024-09-14

TPC1

MDA-T41

NT  
sgRNA      RAIN  
sgRNA

NT  
sgRNA      RAIN  
sgRNA

RUNX2

RUNX2

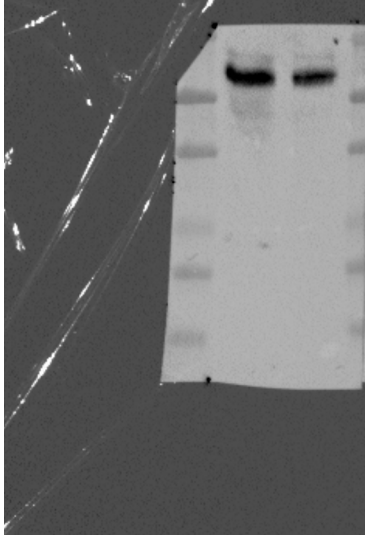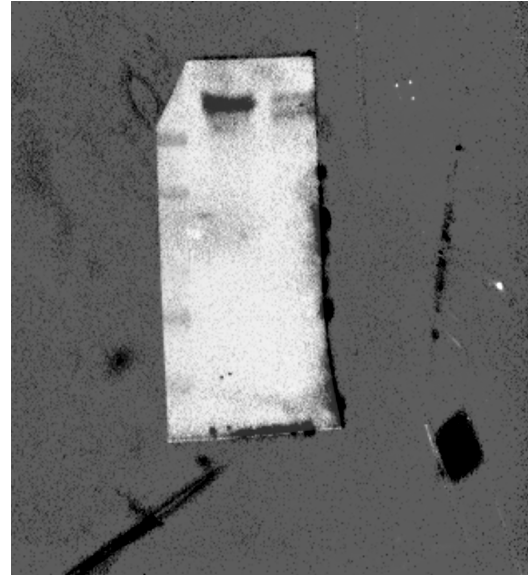

Actin

Actin

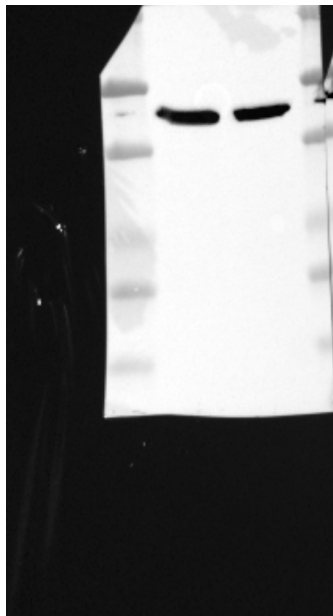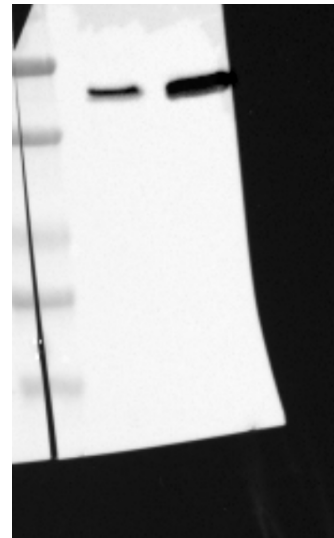

Supplement: MOESM2 [file 41419_2024_7058_MOESM2_ESM.pdf]
